# Supplementary material
Source: MDPI journal article supplement (https://www.mdpi.com/2071-1050/5/4/1568)
Supplement: s1 [file s1]

## Supplementary Materials

### **Theorem:**

The aggregate GSV measure  $aggrGSV_I = n \cdot (\bar{y} - f(\bar{\mathbf{x}}))$  indicates the sum of profit efficiencies of the firms in group I at the most favorable non-negative input prices. Specifically:

$$aggrGSV_I = \max_{\mathbf{w} \geq 0} \sum_{i=1}^n ((y_i - \mathbf{w}'\mathbf{x}_i) - \pi(\mathbf{w})).$$

### **Proof:**

Starting from the average profit inefficiency stated on the right-hand side of the equation posited in the Theorem, we can reorganize the expression as:

$$\max_{\mathbf{w} \geq 0} \sum_{i=1}^n ((y_i - \mathbf{w}'\mathbf{x}_i) - \pi(\mathbf{w})) \quad (\text{A1})$$

$$= n \cdot \max_{\mathbf{w} \geq 0} \left( \sum_{i=1}^n y_i / n - \sum_{i=1}^n \mathbf{w}'(\mathbf{x}_i / n) - \pi(\mathbf{w}) \right) \quad (\text{A2})$$

$$= n \cdot \max_{\mathbf{w} \geq 0} (\bar{y} - \mathbf{w}'\bar{\mathbf{x}} - \pi(\mathbf{w})) \quad (\text{A3})$$

$$= n \cdot \left( \bar{y} - \min_{\mathbf{w} \geq 0} (\mathbf{w}'\bar{\mathbf{x}} + \pi(\mathbf{w})) \right). \quad (\text{A4})$$

Regarding the minimization problem, note that the cost of the average input vector (i.e.,  $\mathbf{w}'\bar{\mathbf{x}}$ ) increases as the input prices  $\mathbf{w}$  increase, whereas the profit function  $\pi(\mathbf{w})$  is a decreasing function of  $\mathbf{w}$ . Since  $f$  is concave,  $\pi(\mathbf{w})$  is convex, and thus the minimization problem has a unique global optimum.

Differentiating  $(\mathbf{w}'\bar{\mathbf{x}} + \pi(\mathbf{w}))$  with respect to input prices  $\mathbf{w}$ , we have the first-order conditions:

$$\bar{\mathbf{x}} + \nabla \pi(\mathbf{w}) = 0, \quad (\text{A5})$$

where  $\nabla \pi(\mathbf{w})$  is the subgradient of the profit function at  $\mathbf{w}$ . If  $f$  is differentiable, then the subgradient reduces to the gradient vector:

$$\nabla \pi(\mathbf{w}) = \left( \frac{\partial \pi(\mathbf{w})}{\partial w_1} \dots \frac{\partial \pi(\mathbf{w})}{\partial w_R} \right)'$$

By Hotelling's lemma (Hotelling 1932):

$$\nabla \pi(\mathbf{w}) = \begin{pmatrix} -x_1^*(\mathbf{w}) \\ \vdots \\ -x_R^*(\mathbf{w}) \end{pmatrix} = -\mathbf{x}^*(\mathbf{w}), \quad (\text{A6})$$

where  $\mathbf{x}^*(\mathbf{w})$  is the optimal profit maximizing input vector at prices  $\mathbf{w}$ .

Hotelling's lemma can also be established for non-differentiable functions by using the sub-gradients (see e.g., Blume 2008 for details). In that case,  $\mathbf{x}^*(\mathbf{w})$  is not unique, but it does not influence the optimal solution to the minimization problem in (A4).

Inserting the right-hand side of (A6) to equality (A5), we have the first-order condition:

$$\bar{\mathbf{x}} - \mathbf{x}^*(\mathbf{w}) = 0. \quad (\text{A7})$$

Therefore, the optimal solution to the minimization problem of (A4) can be expressed as:

$$\min_{\mathbf{w} \geq \mathbf{0}} (\mathbf{w}'\bar{\mathbf{x}} + \pi(\mathbf{w})) = \mathbf{w}'\bar{\mathbf{x}} + (f(\bar{\mathbf{x}}) - \mathbf{w}'\bar{\mathbf{x}}) = f(\bar{\mathbf{x}}). \quad (\text{A8})$$

Inserting the last expression of (A8) back to (A4), we have:

$$\max_{\mathbf{w} \geq \mathbf{0}} \left( \sum (y_i - \mathbf{w}'\mathbf{x}_i) - \pi(\mathbf{w}) \right) = n \cdot (\bar{y} - f(\bar{\mathbf{x}})) = \text{aggrGSV}_I. \quad (\text{A9})$$
